# Supplementary material for: In Vivo Analysis of Optic Fissure Fusion in Zebrafish: Pioneer Cells, Basal Lamina, Hyaloid Vessels, and How Fissure Fusion is Affected by BMP
Source: Int J Mol Sci. 2020 Apr 16;21(8):2760. doi: 10.3390/ijms21082760 (PMC7215994; doi:10.3390/ijms21082760)
Supplement: Supplementary file 1 [file ijms-21-02760-s001.zip]

Archive with 18 entries (16 files):
- figues/
- figues/Figure 1 Supplement.pdf
- figues/Figure 2 Supplement.pdf
- figues/Figure 3 Supplement.pdf
- figues/Figure 4 Supplement.pdf
- figure  legends .pdf
- movie  legends .pdf
- movies/
- movies/Supplement Movie 1.avi
- movies/Supplement Movie 10.avi
- movies/Supplement Movie 2.avi
- movies/Supplement Movie 3.avi
- movies/Supplement Movie 4.avi
- movies/Supplement Movie 5.avi
- movies/Supplement Movie 6.avi
- movies/Supplement Movie 7.avi
- movies/Supplement Movie 8.avi
- movies/Supplement Movie 9.avi
