# Supplementary figures and images for: In Vivo Analysis of Optic Fissure Fusion in Zebrafish: Pioneer Cells, Basal Lamina, Hyaloid Vessels, and How Fissure Fusion is Affected by BMP
Source: MDPI journal article supplement (doi:10.3390/ijms21082760), 2020-04-16

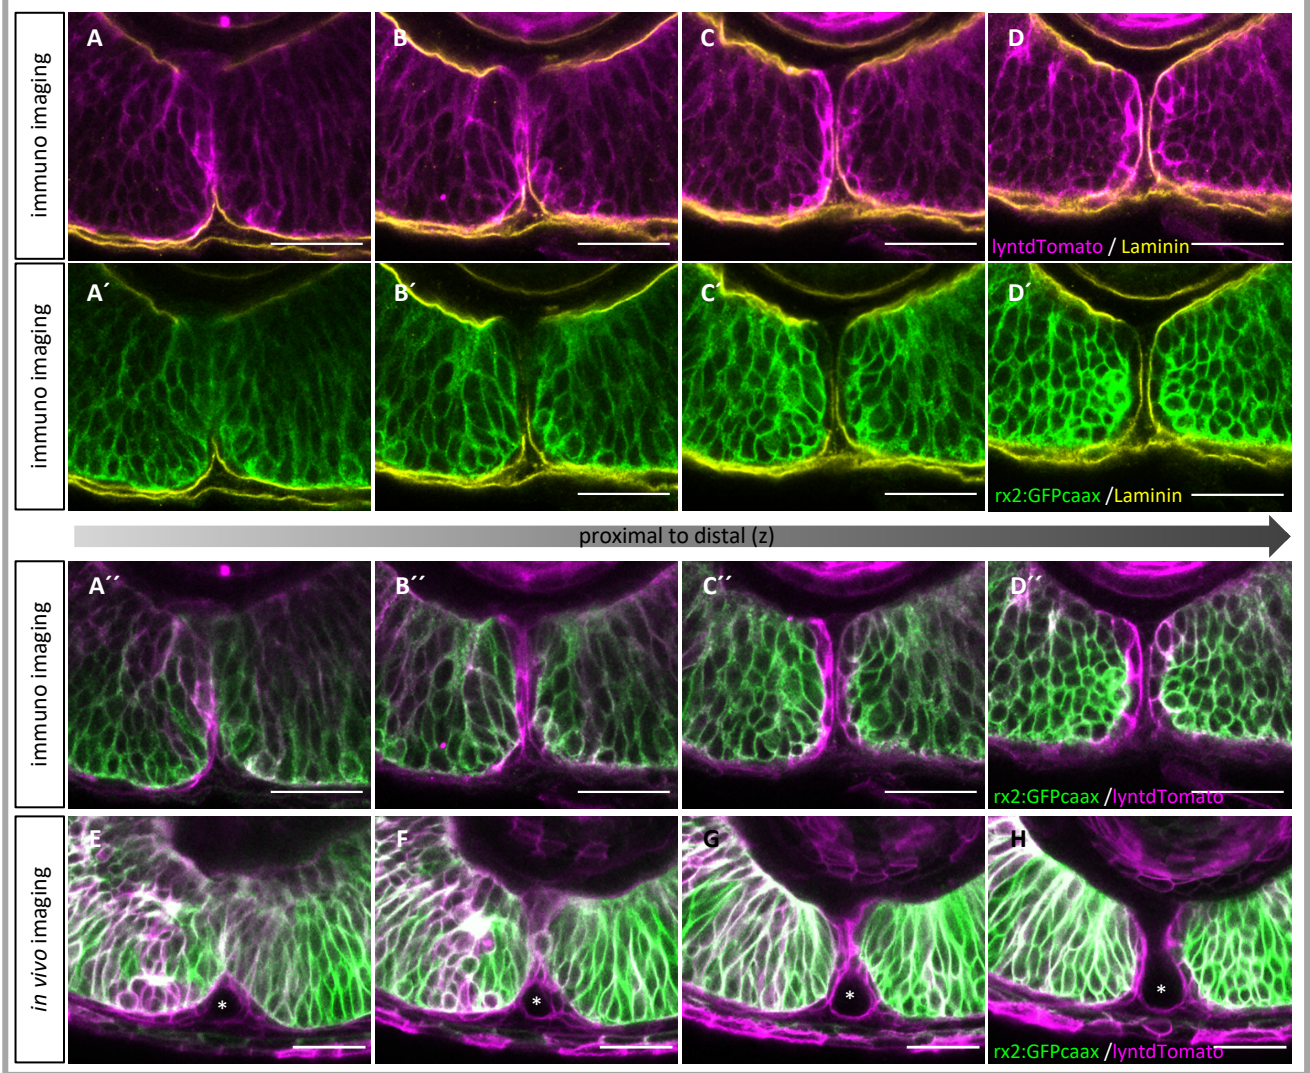

Figure 2 Supplement Eckert et al., 2020

Supplement: s1 [file s1]

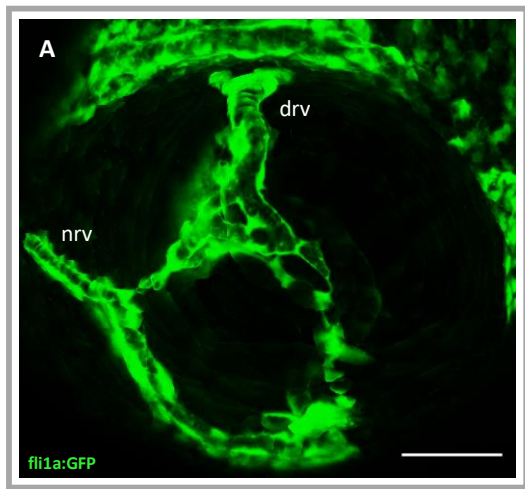

Figure 7 Supplement Eckert et al., 2020

Supplement: s1 [file s1]

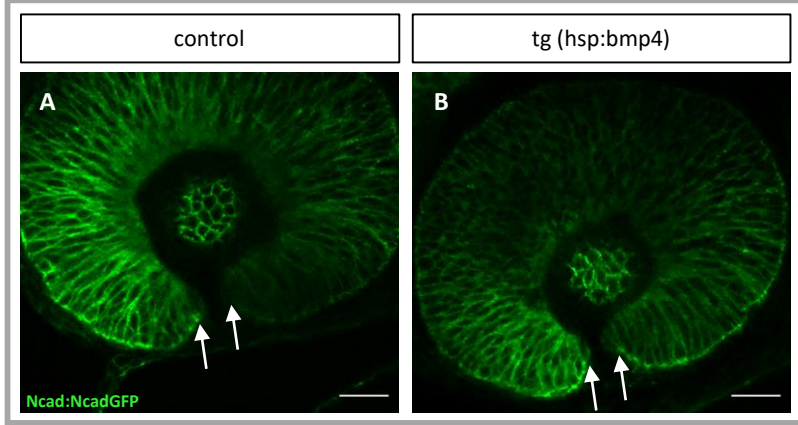

Figure 5 Supplement Eckert et al., 2020

Supplement: s1 [file s1]

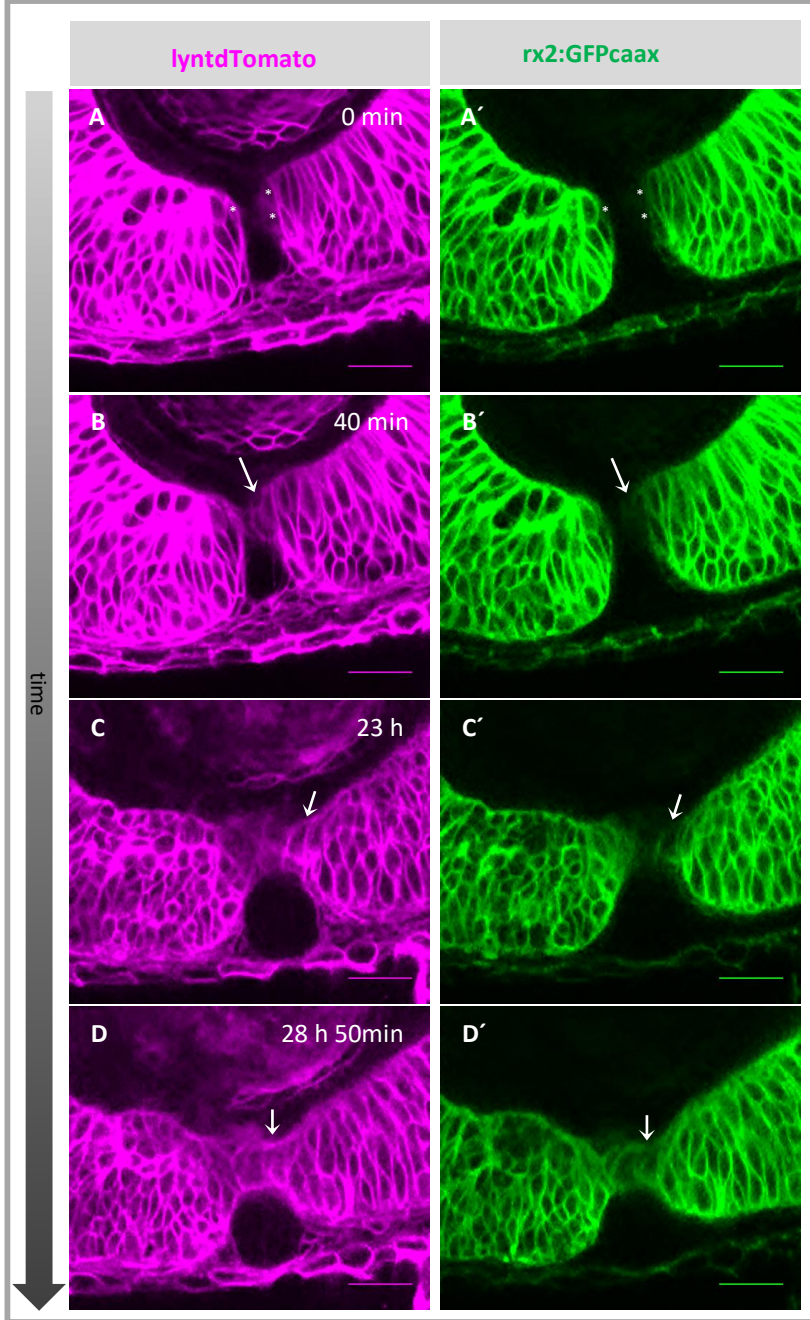

Revised Figure 1 Supplement Eckert et al., 2020

Supplement: s1 [file s1]
